# Supplementary material for: Characteristics of poly-silicate aluminum sulfate prepared by sol method and its application in Congo red dye wastewater treatment
Source: Royal Society of Chemistry journal article supplement (doi:10.1039/d1ra06343j), 2021-01-01
Supplement: d1ra06343j1.pdf [file d1ra06343j1.pdf]

## Characteristics of poly-silicate aluminum sulfate prepared by sol method and its application in the Congo Red dye wastewater treatment

Yunlong Zhao<sup>1</sup>, Yajie Zheng<sup>1\*</sup>, Yinglin Peng<sup>2</sup>, Hanbin He<sup>1</sup>, Zhaoming Sun<sup>1</sup>

(1. School of Metallurgy and Environment, Central South University, Changsha 410083; 2.

School of Materials and Chemical Engineering, Hunan City University, Yiyang 413099)

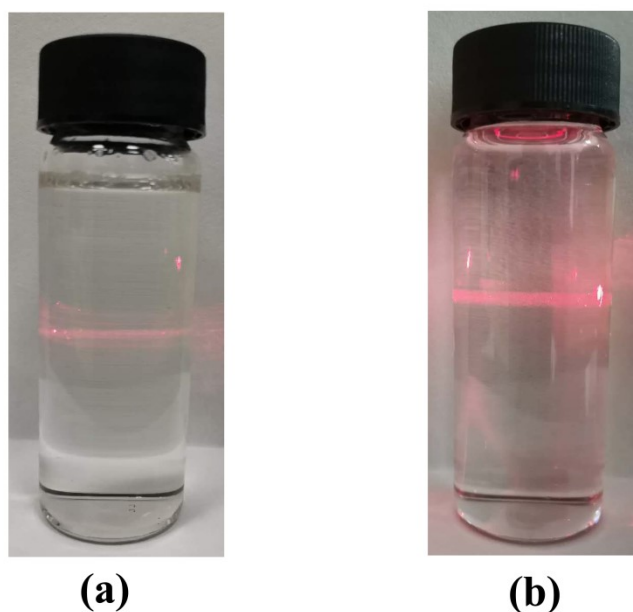

**Fig.S1** Tindal effect of PSAS<sub>1.11</sub> coagulant; (a) PSAS<sub>1.11</sub> (Al/Si of 20, Al molar ratio of precursor to aluminum sulfate: 0/12) and (b) PSAS<sub>1.11</sub> (Al/Si of 20, Al molar ratio of precursor to aluminum sulfate: 1/12)

---

\* Corresponding author.

E-mail address: [zyj@csu.edu.cn](mailto:zyj@csu.edu.cn) (Ya-jie Zheng).

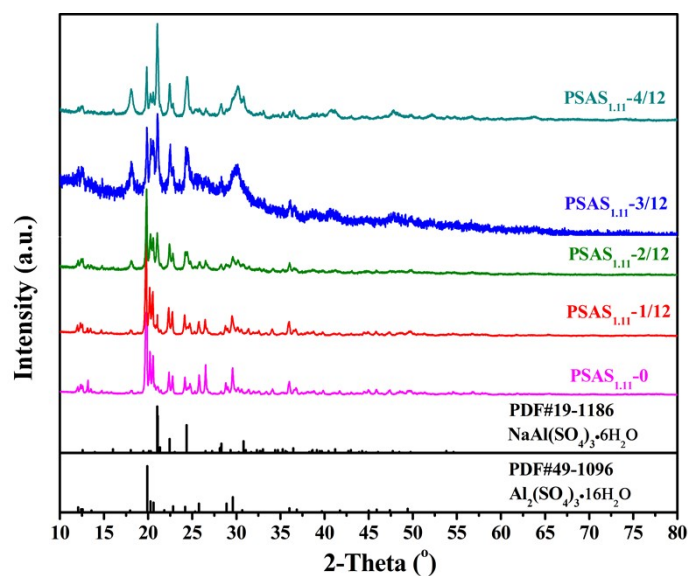

Fig. S2 XRD of the PSAS<sub>1.11</sub> powder with 20 of Al/Si

Table S1 Distribution of Al species of determined by Al-Ferron timed complex method

| PSAS <sub>1.11</sub>                                               | Ala (%) | Alb (%) | Alc (%) |
|--------------------------------------------------------------------|---------|---------|---------|
| $\frac{n_{Al(\text{presursor})}}{n_{Al(\text{Aluminum sulfate})}}$ |         |         |         |
| 0                                                                  | 90.97   | 8.77    | 0.26    |
| 1/12                                                               | 75.19   | 23.31   | 1.5     |
| 4/12                                                               | 62.15   | 25.81   | 12.03   |

Table S2 Comparison of coagulation performance on Congo Red y using different coagulants

| Coagulant                                                               | Initial concentration (mg L <sup>-1</sup> ) | Optimum coagulant dosage (mg L <sup>-1</sup> ) | pH  | Removal color efficiency (%) | Refs             |
|-------------------------------------------------------------------------|---------------------------------------------|------------------------------------------------|-----|------------------------------|------------------|
| FeCl <sub>3</sub> ·6H <sub>2</sub> O                                    | 500                                         | 200                                            | 3-9 | 99.92                        | [36]             |
| PAC                                                                     | 500                                         | 150                                            | 3-9 | 99.82                        | [37]             |
| Nature                                                                  | 60                                          | 25                                             | 4   | 74-85                        | [37]             |
| PSM(N)                                                                  | 100                                         | 10                                             | 12  | 95.2                         | [38]             |
| PSM(P)                                                                  | 100                                         | 8                                              | 13  | 92                           | [38]             |
| Fe <sub>2</sub> (SO <sub>4</sub> ) <sub>3</sub> and Ca(OH) <sub>2</sub> | 100                                         | 350                                            | 7   | 90                           | [39]             |
| PSAS <sub>1.11</sub> -1/12                                              | 100                                         | 40                                             | 11  | 98.6                         | <b>This work</b> |

**Table S3** Relationship between Congo Red concentration and absorbance

| Concentration (mg/L) | Absorbance (nm) |
|----------------------|-----------------|
| 0                    | 0.000           |
| 50                   | 0.501           |
| 100                  | 1.018           |
| 150                  | 1.498           |
| 200                  | 2.016           |

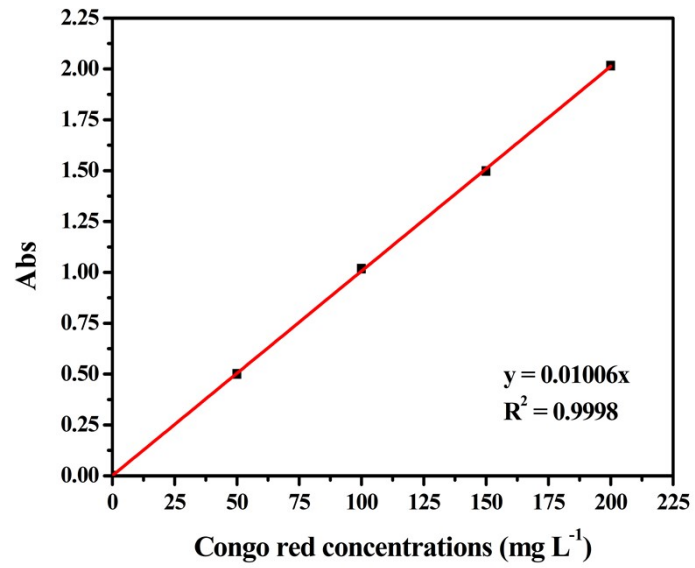

**Fig. S3** Congo Red concentration and absorbance fitting curve
